# Supplementary material for: The Combined Effect of Weaning Stress and Immune Activation during Pig Gestation on Serum Cytokine and Analyte Concentrations
Source: MDPI journal article supplement (doi:10.3390/ani11082274), 2021-08-01
Supplement: s1 [file s1]

**Table S1.** Nutrient composition of the diets.

| Ingredients <sup>1</sup> %               | Gestation<br>-114 day<br>to 0 day | Lactation 0 day to 21<br>(weaned) or 22 day<br>(nursed) | Post-weaning<br>day 22 |
|------------------------------------------|-----------------------------------|---------------------------------------------------------|------------------------|
| Corn                                     | 77.15                             | 67.40                                                   | 30.74                  |
| Soybean meal, 48 % CP                    | 11.55                             | 24.13                                                   | 20.39                  |
| Beet pulp                                | 7.00                              | 0.00                                                    | 0.00                   |
| Blood plasma                             | 0.00                              | 0.00                                                    | 7.56                   |
| Whey, dried                              | 0.00                              | 0.00                                                    | 25.19                  |
| Milk, Lactose                            | 0.00                              | 0.00                                                    | 10.08                  |
| Choice white grease                      | 1.00                              | 5.01                                                    | 3.02                   |
| Limestone                                | 0.75                              | 0.89                                                    | 1.15                   |
| Dicalcium phosphate                      | 1.90                              | 1.86                                                    | 0.63                   |
| Lysine HCL                               | 0.00                              | 0.05                                                    | 0.04                   |
| DL-Met                                   | 0.00                              | 0.00                                                    | 0.14                   |
| Salt                                     | 0.00                              | 0.00                                                    | 0.10                   |
| Cu sulfate                               | 0.00                              | 0.00                                                    | 0.00                   |
| ZnO                                      | 0.00                              | 0.00                                                    | 0.40                   |
| Swine trace minerals premix <sup>2</sup> | 0.35                              | 0.35                                                    | 0.35                   |
| Vitamin premix <sup>3</sup>              | 0.20                              | 0.20                                                    | 0.20                   |
| Sow pac <sup>4</sup>                     | 0.10                              | 0.10                                                    | 0.00                   |
| Total                                    | 100.00                            | 100.00                                                  | 100.00                 |

<sup>1</sup> Diets formulated to meet or exceed the NRC 2012 requirements for swine.

<sup>2</sup> Ingredients: copper, iodine, iron, manganese, selenium, zinc.

<sup>3</sup> Ingredients: vitamin A, vitamin D, vitamin E, vitamin K, niacin, pantothenic acid, riboflavin, and vitamin B12

<sup>4</sup> Ingredients: vitamin A, choline, D-biotin, and folic acid.

**Table S2.** Descriptive statistics of the serum chemistry (log<sub>e</sub>-transformed), cortisol, body weight, and cytokine indicators analyzed for all samples and for baseline 22-day-old nursed pigs from control gilts.

| Indicator <sup>2</sup> | Unit   | All Samples |      | Baseline Samples |      |
|------------------------|--------|-------------|------|------------------|------|
|                        |        | Mean        | SE   | Mean             | SE   |
| AGRatio                |        | 0.47        | 0.04 | 0.45             | 0.06 |
| Albumin                | g/dl   | 1.08        | 0.01 | 1.05             | 0.02 |
| AlkPhos                | U/l    | 6.72        | 0.04 | 6.73             | 0.04 |
| AnionGap               | mmol/l | 2.88        | 0.02 | 2.82             | 0.02 |
| AST                    | U/l    | 3.75        | 0.09 | 3.66             | 0.12 |
| Bicarbonate            | mmol/l | 3.16        | 0.01 | 3.21             | 0.01 |
| Bilirubin              | mg/dl  | -0.34       | 0.10 | -0.96            | 0.07 |
| BUN                    | mg/dl  | 2.16        | 0.05 | 2.07             | 0.06 |
| Calcium                | mg/dl  | 2.35        | 0.01 | 2.40             | 0.01 |
| Chloride               | mmol/l | 4.61        | 0.00 | 4.60             | 0.01 |
| Cholesterol            | mg/dl  | 5.30        | 0.04 | 5.31             | 0.05 |
| CPK                    | U/l    | 6.36        | 0.08 | 6.27             | 0.09 |
| Creatinine             | mg/dl  | -0.12       | 0.02 | -0.20            | 0.04 |
| GGT                    | U/l    | 3.73        | 0.03 | 3.67             | 0.04 |
| GLDH                   | U/l    | 0.35        | 0.06 | 0.36             | 0.11 |
| Globulin               | g/dl   | 0.62        | 0.04 | 0.59             | 0.05 |
| Glucose                | mg/dl  | 4.88        | 0.03 | 5.06             | 0.02 |
| NaKRatio               |        | 3.50        | 0.01 | 3.52             | 0.02 |
| Phosphorous            | mg/dl  | 2.24        | 0.01 | 2.18             | 0.02 |
| Potassium              | mmol/l | 1.42        | 0.01 | 1.40             | 0.02 |
| Protein                | g/dl   | 1.59        | 0.02 | 1.56             | 0.02 |
| Sodium                 | mmol/l | 4.93        | 0.00 | 4.92             | 0.01 |
| Triglycerides          | mg/dl  | 4.43        | 0.08 | 4.18             | 0.11 |
| Cortisol               | ng/ml  | 3.48        | 0.06 | 3.26             | 0.08 |
| Body Weight            | kg     | 6.02        | 0.14 | 5.87             | 0.22 |
| GM-CSF                 | ng/ml  | 0.15        | 0.03 | 0.13             | 0.04 |
| IFN- $\gamma$          | ng/ml  | 40.87       | 4.87 | 36.20            | 6.07 |
| IL-1 $\alpha$          | ng/ml  | 0.21        | 0.02 | 0.18             | 0.03 |
| IL-1 $\beta$           | ng/ml  | 0.81        | 0.09 | 0.67             | 0.12 |
| IL-1ra                 | ng/ml  | 1.08        | 0.10 | 1.02             | 0.14 |
| IL-2                   | ng/ml  | 1.10        | 0.16 | 0.79             | 0.19 |
| IL-4                   | ng/ml  | 4.52        | 0.71 | 3.05             | 0.79 |
| IL-4                   | ng/ml  | 0.42        | 0.05 | 0.38             | 0.06 |
| IL-10                  | ng/ml  | 1.95        | 0.26 | 1.49             | 0.32 |
| IL-12                  | ng/ml  | 0.69        | 0.04 | 0.73             | 0.06 |
| IL-18                  | ng/ml  | 1.88        | 0.44 | 1.10             | 0.42 |
| TNF-a                  | ng/ml  | 0.45        | 0.05 | 0.46             | 0.07 |

<sup>1</sup>AG Ratio = albumin:globulin ratio; AlkPhos = alkaline phosphatase; AST = aspartate amino transferase; BUN = blood urea nitrogen; CPK = creatine phosphokinase; GGT = gamma glutamyl transferase; GLDH = glutamate dehydrogenase; NaK Ratio = sodium:potassium ratio; Protein = total protein; GM-CSF = granulocyte-macrophage colony-stimulating factor; IFN- $\gamma$  = interferon gamma; IL-1 $\alpha$  = interleukin 1

alpha; IL-1 $\beta$  = interleukin 1 beta; IL-2 = interleukin 2; IL-4 = interleukin 4; IL-6 = interleukin 6; IL-10 = interleukin 10; IL-12 = interleukin 12; IL-18 = interleukin 18; TNF- $\alpha$  = tumor necrosis factor alpha.
